# Supplementary material for: Electrodepositing amorphous molybdenum oxides for aqueous NH4+ storage
Source: Royal Society of Chemistry journal article supplement (doi:10.1039/d2cc06450b), 2023-01-01
Supplement: d2cc06450b1.pdf [file d2cc06450b1.pdf]

## Supporting Information

### Electrodepositing Amorphous Molybdenum Oxides for Aqueous $\text{NH}_4^+$ Storage

Yulai Lin, Lintuoya Ta, Jianming Meng, Yu Song\*, Xiao-Xia Liu\*

Department of Chemistry, Northeastern University, Shenyang, China, 110819

Email: [songyu@mail.neu.edu.cn](mailto:songyu@mail.neu.edu.cn); [xxliu@mail.neu.edu.cn](mailto:xxliu@mail.neu.edu.cn).

## 1. Experimental section

### 1.1 Materials

All the chemical reagents were purchased from Sinopharm Chemical Reagent Co., ltd. Graphite foil was purchased from SGL Carbon, Germany.

### 1.2 Electrochemical exfoliation of the graphite foil (EG)

EG (working area:  $0.8 \times 0.8 \text{ cm}^2$ ) was exfoliated in a three-electrode cell, using a saturated calomel electrode (SCE) as the reference electrode and a piece of graphite foil as the counter electrode, respectively. The graphite foil was first treated in a 0.5 M KOH solution using voltammetry (CV) at 0.5 to 1.75 V at the scan rate of  $20 \text{ mV s}^{-1}$  for 6 cycles. The graphite/graphene sheets were partially exfoliated from the graphite base, forming a three-dimensional morphology. To conduct secondary exfoliation and functional modification, the exfoliated graphite foil was further exfoliated in 0.5 M  $\text{KNO}_3$  electrolyte using a constant potential of 1.85 V vs. SCE for 30 min. Third, the exfoliated graphite foil was treated in 0.5 M  $\text{KNO}_3$  electrolyte to recover the conductivity via CV from -1.2 V to 0 V vs. SCE for 20 cycles at the scan rate of  $50 \text{ mV s}^{-1}$ .

### 1.3 Electrochemical deposition of $\text{MoO}_x$ in different concentrated electrolytes

The material deposition was conducted in a three-electrode system, using EG as the working electrode, SCE and a piece of graphite foil as the reference and counter electrodes. Different concentrated ammonium molybdate  $[(\text{NH}_4)_6\text{Mo}_7\text{O}_{24} \cdot 4\text{H}_2\text{O}]$  solutions of 0.025, 0.2 and 0.3 m ( $\text{mol kg}^{-1}$ ), corresponding to 0.025, 0.167, and 0.237 M ( $\text{mol L}^{-1}$ ), were used as the deposition electrolytes. During the deposition, a constant current density of  $\sim -7.8 \text{ mA cm}^{-2}$  was applied on the working electrode, to obtain the electrodes, denoted as  $\text{MoO}_x$ -0.025,  $\text{MoO}_x$ -0.2 and  $\text{MoO}_x$ -0.3, respectively. All the active mass loading of the electrodes was controlled at about  $7.0\sim 8.0 \text{ mg cm}^{-2}$  via adjusting the deposition time (from 10 to 16 mins). The weight ratio of  $\text{MoO}_x$ : EG is about 30%.

### 1.4 Characterizations

The morphology and structure features of the samples were studied on transmission electron

microscope (TEM, JEM-ARM200F, JEOL, Japan) and scanning electron microscopy (SEM, HITACHI, SU8010, Japan). The crystal structures of the materials were studied by X-ray diffraction (XRD, PANalytical B.V., XPert Pro, Netherlands) using a Cu K $\alpha$  radiation source (40.0 kV, 40.0 mA). Fourier transform infrared spectroscopy was performed on a Fourier transform infrared spectrometer (FTIR, Bruker, VERTEX70, Germany). The specific surface area and the pore size distribution of the electrodes were tested by a physisorption analyzer (ASAP 2460, micromeritics, America). The chemical composition of the materials was studied by X-ray photoelectron spectroscopy (XPS, Thermo Scientific, ESCALAB 250Xi, USA) with Al K $\alpha$  radiation ( $\lambda = 8.34 \text{ \AA}$ ) as the excitation source. The electrochemical measurements of the materials were studied by a multichannel working station (VMP3, Bio-Logic, France).

## 2. Supplementary Figures

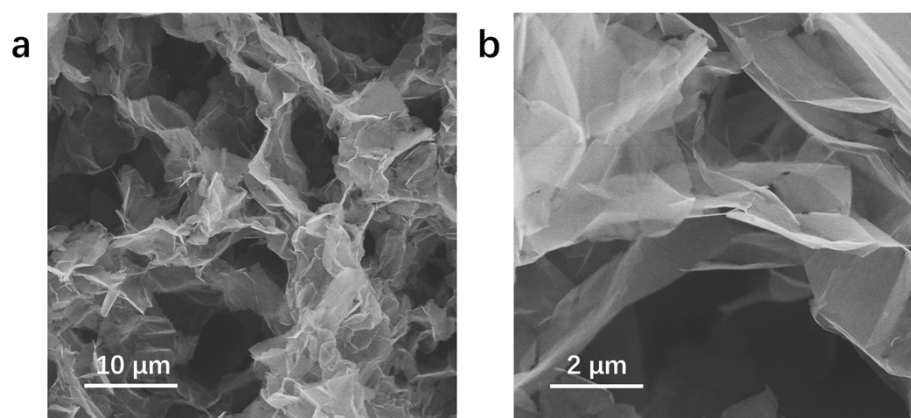

**Fig. S1.** SEM images of EG.

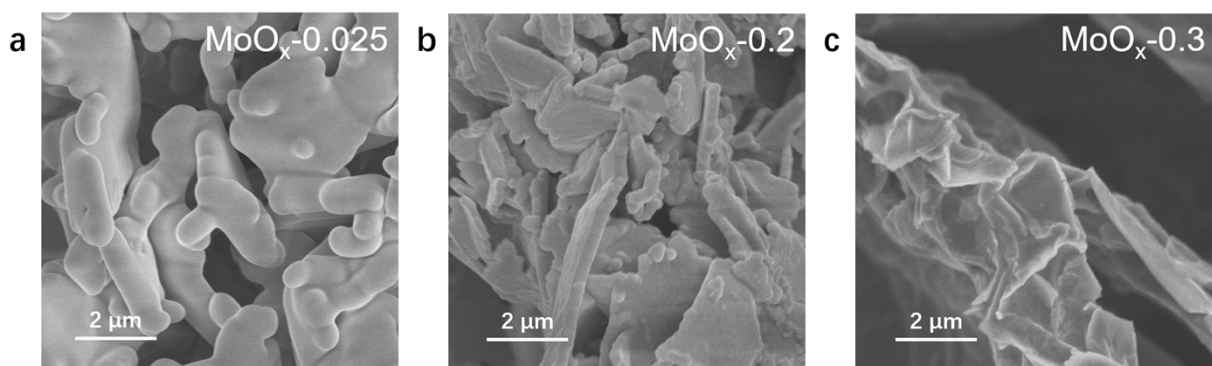

**Fig. S2.** SEM images of MoO<sub>x-0.025</sub>、MoO<sub>x-0.2</sub> and MoO<sub>x-0.3</sub>.

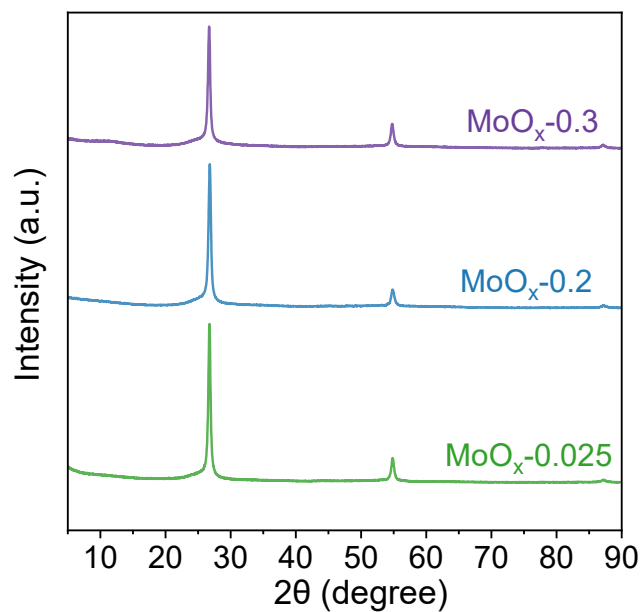

**Fig. S3.** XRD patterns of  $\text{MoO}_x-0.025$ 、 $\text{MoO}_x-0.2$  and  $\text{MoO}_x-0.3$ .

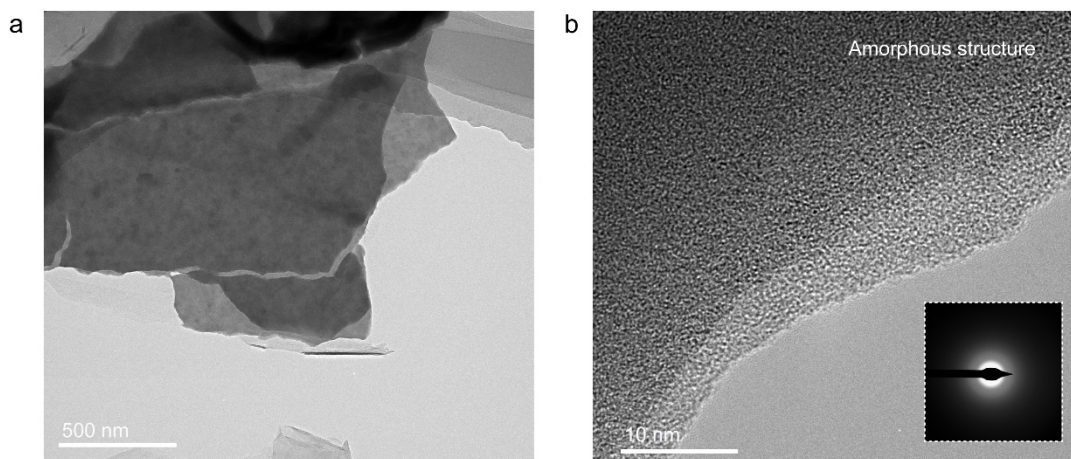

**Fig. S4** TEM images of  $\text{MoO}_x-0.2$ . Insert shows the SAED pattern. HRTEM and SAED pattern suggest that the deposited oxide is amorphous structure, in which a random arrangement of distorted Mo-O polyhedra with short range ordering is presented.

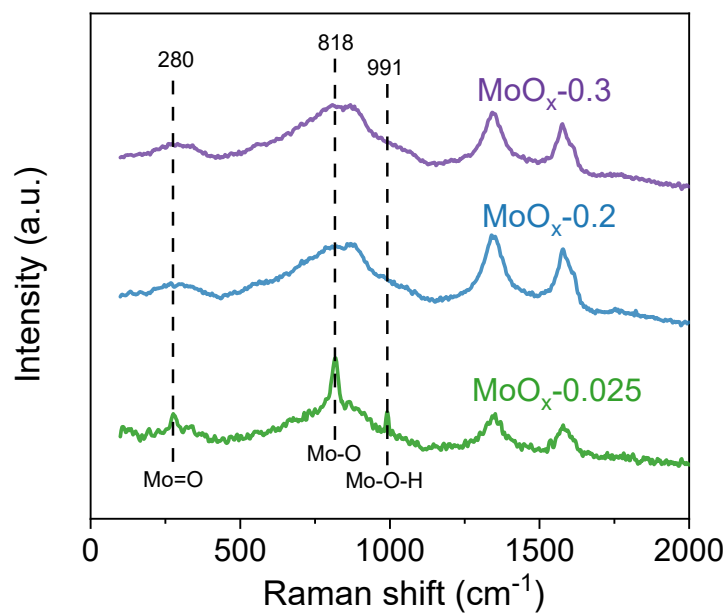

**Fig. S5.** Raman spectra of  $\text{MoO}_x-0.025$ ,  $\text{MoO}_x-0.2$  and  $\text{MoO}_x-0.3$ .

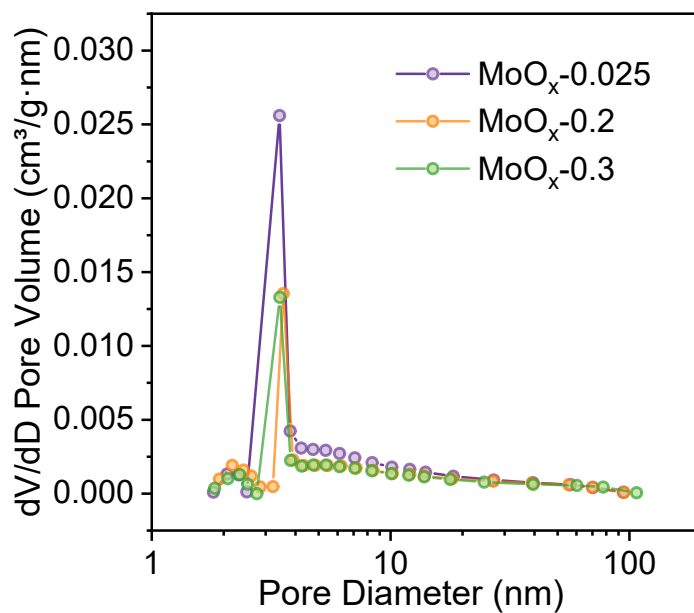

**Fig. S6.** The pore size distribution of  $\text{MoO}_x-0.025$ ,  $\text{MoO}_x-0.2$  and  $\text{MoO}_x-0.3$  derived from the adsorption curves using BJH theory.

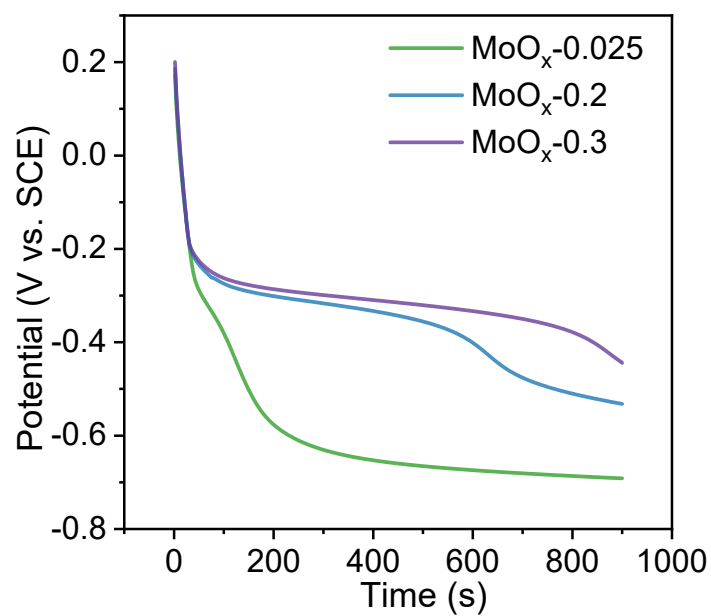

**Fig. S7.** The deposition curves of the samples in different concentrated plating electrolytes.

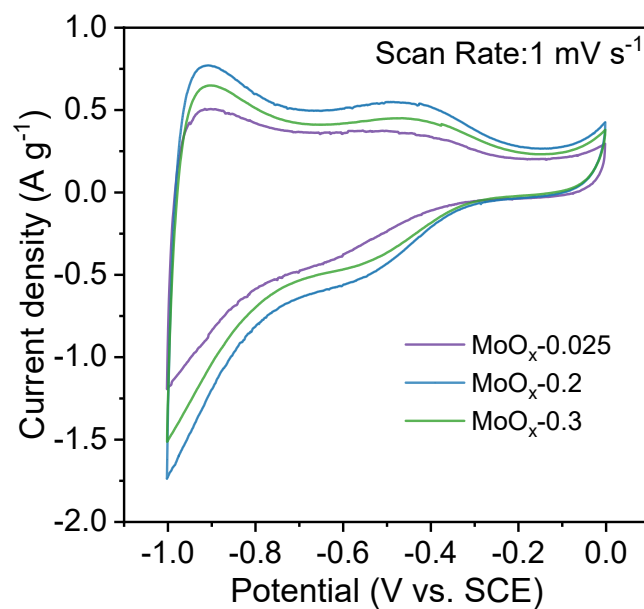

**Fig. S8** The CV curves of MoO<sub>x</sub>-0.025、MoO<sub>x</sub>-0.2 and MoO<sub>x</sub>-0.3.

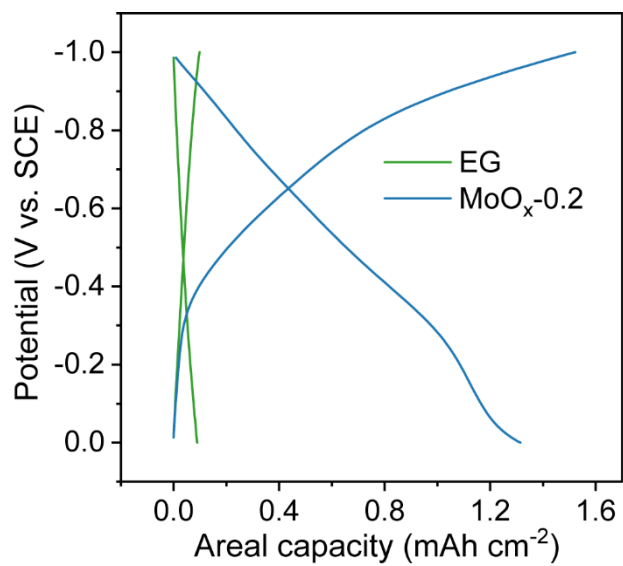

**Fig. S9** Areal capacity of the EG substrate and MoO<sub>x</sub>-0.2 at the current density of 1.56 mA cm<sup>-2</sup>.

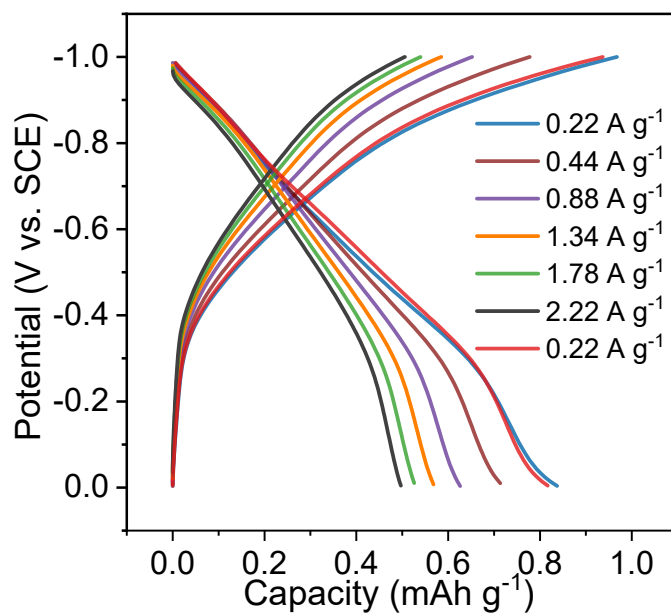

**Fig. S10.** The galvanostatic charge/discharge curves of MoO<sub>x</sub>-0.2 from 0.22 to 2.22 A g<sup>-1</sup>.



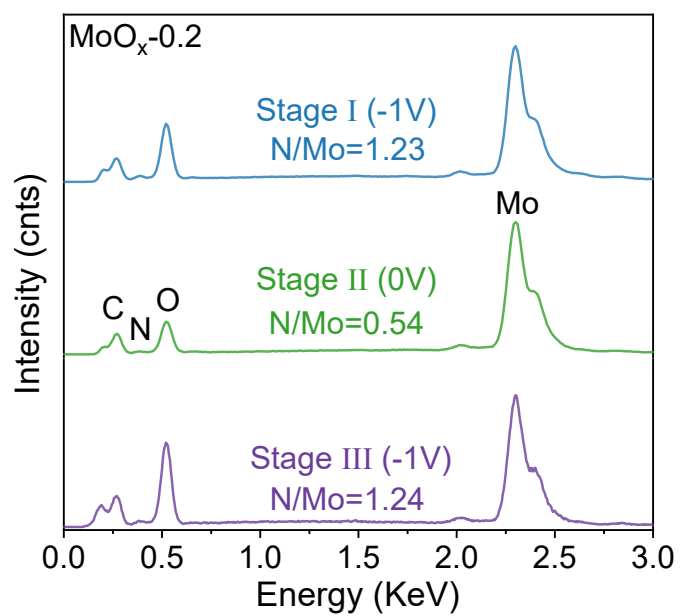

**Fig. S11.** The EDX spectra of the electrodes collected at different states of charge, (a) -1 V, (b) 0 V, (c) -1 V.
